# Supplementary material for: Comparative transcriptome analysis of persimmon somatic mutants (Diospyros kaki) identifies regulatory networks for fruit maturation and size
Source: Front Plant Sci. 2024 Aug 2;15:1448851. doi: 10.3389/fpls.2024.1448851 (PMC11327018; doi:10.3389/fpls.2024.1448851)
Supplement: Supplementary file 8 [file Table_3.xlsx]

## Sheet: Sup.Table1
S table 1-Summary of genotyping-by-sequencing reads mapping.
Order	SampleID	Sample name	Sum of raw reads	Total length of raw reads	Total length of trimmed reads (bp)	Avg. length of trimmed reads (bp)	Trimmed/Raw (%)	Sum of trimmed reads	No. of mapped reads	Percent of mapped reads (%)	No. of mapped region	Avg. depth of mapped region (#)	Medain depth of mapped region (#)	Total length of mapped region (bp)	Avg. length of mapped region (bp)	Reference Genome coverage (%)	No. of Total SNP	No. of homozygous SNPs (read depth ≥ 90%)	No. of heterozygous SNPs (40% ≤ read depth ≤ 60%)	No. other SNPs
001	A1	Mujubansi	10254562	1548438862	966291092	102.658	0.917903	9412694	8413565	0.893853	133792	24.9807	9.86561	33402618	249.661	0.0471278	342380	145610	67326	129444
002	A2	Suhong	5800758	875914458	547427505	102.67	0.919179	5331936	4792746	0.898875	108005	18.9206	8.83333	25609302	237.112	0.0361322	262999	112156	52680	98163
003	A3	Gyeongjusogodongsi	8495074	1282756174	801668024	102.596	0.91981	7813850	6979215	0.893185	126419	22.2759	9.27043	31332289	247.845	0.0442068	319471	134456	64255	120760
004	A4	Changnyeongmeokgam	9943184	1501420784	766479368	96.694	0.797215	7926854	7467159	0.942008	113692	28.212	11.666	25075570	220.557	0.0353792	265300	116004	50611	98685
005	A5	Changnyeongbansi	4576694	691080794	360972330	98.9435	0.79714	3648266	3416252	0.936404	92632	16.1689	8.99447	20203409	218.104	0.028505	212669	95555	40908	76206
006	A6	Changnyeongttabaegam	6958356	1050711756	559144142	100.837	0.79689	5545044	4948460	0.892411	102647	20.8516	10.4034	23177260	225.796	0.0327009	241618	105409	46428	89781
007	A7	Samcheoksokgam	8603726	1299162626	689450421	100.621	0.796391	6851926	6393771	0.933135	115158	23.2353	11.3063	27053638	234.926	0.03817	287257	125158	54464	107635
008	A8	Hamansusi	5115016	772367416	413057564	101.145	0.798394	4083800	3676189	0.900188	102197	14.9776	8.17241	24110154	235.918	0.0340171	246335	107569	48842	89924
009	A9	Miryangsusigam	2632666	397532566	204324506	97.2705	0.797891	2100580	1953832	0.930139	84191	10.4624	6.97059	16561963	196.719	0.0233673	171646	81052	34188	56406
010	A10	Miryangmulgam	5980448	903047648	479787323	100.72	0.796525	4763578	4409034	0.925572	109670	16.2115	8.67209	26563107	242.209	0.0374779	268921	116721	53215	98985
011	A11	Miryanggojongsi	1768794	267087894	138775458	98.0981	0.799788	1414660	1336864	0.945007	67744	9.54307	6.34078	12147857	179.32	0.0171394	128139	63088	26075	38976
012	A12	Ohtanenashi 1	7556416	1141018816	601183807	99.9873	0.795695	6012600	5590431	0.929786	119831	18.3081	9.25	29068897	242.582	0.0410134	296492	117856	60292	118344
013	A13	Gyeongjutabaegam	9091760	1372855760	855341050	102.547	0.917421	8340972	7507532	0.900079	130165	22.6618	9.63636	33254268	255.478	0.0469185	335347	135269	67941	132137
014	A14	Andongdongwoogam	9904122	1495522422	793296296	100.342	0.798245	7905920	7204758	0.911312	117393	24.6602	10.5272	28605380	243.672	0.0403594	291564	125413	56563	109588
015	A15	Andongmumulgam	8569360	1293973360	809366825	102.852	0.918297	7869220	6841755	0.869432	122133	22.7625	9.10588	30654057	250.989	0.0432499	308038	127061	62676	118301
016	A16	Goryeongbansi	15446142	2332367442	1240347641	100.732	0.797177	12313316	11117224	0.902862	132804	32.9684	11.9025	32751857	246.618	0.0462097	328093	139861	63272	124960
017	A17	Andongnabjakgam	9585996	1447485396	908108463	102.939	0.920285	8821850	7744412	0.877867	127699	24.9625	9.79301	31099944	243.541	0.043879	323303	137062	63294	122947
018	A18	Dongugam	23262832	3512687632	2159713669	101.038	0.918862	21375328	19135622	0.89522	159215	47.5323	12.4021	38423687	241.332	0.0542121	357845	158042	67192	132611
019	A19	Seongjudeajubgam	3118764	470933364	245564731	98.7903	0.79702	2485718	2297820	0.924409	84218	12.047	7.34844	17485673	207.624	0.0246706	179216	82124	35832	61260
020	A20	Yeongdeoksangsi	17416720	2629924720	1616522994	101.115	0.917912	15987008	14279685	0.893206	151090	37.4251	11.154	36611337	242.315	0.051655	360732	155142	69612	135978
021	A21	Uljinwonsi	11118990	1678967490	1030858666	100.922	0.918643	10214380	9181602	0.89889	120523	32.1127	11.5824	28574069	237.084	0.0403152	287495	121592	55552	110351
022	A22	Yeongdeokttabaegam	10430952	1575073752	826243884	99.7309	0.794245	8284732	7379194	0.890698	114495	26.1509	11.1703	27748822	242.358	0.0391509	282953	117906	54753	110294
023	A23	Uljinnabjaggam	12465450	1882282950	970030725	97.7931	0.795736	9919210	9108306	0.918249	122200	30.6949	11.6862	28180726	230.612	0.0397603	293310	125779	57256	110275
024	A24	Uljinmulgam	21442354	3237795454	2000485492	101.204	0.921864	19766930	18123792	0.916874	162262	42.8684	12	40171531	247.572	0.0566781	372713	151317	73437	147959
025	A25	Jeonnamkkuligam	6747608	1018888808	531057849	98.9857	0.795096	5364998	4907024	0.914637	117126	16.8605	8.53417	27200198	232.23	0.0383768	282170	121109	56442	104619
026	A26	Jeonnam	3784370	571439870	291376447	96.7566	0.795757	3011438	2706522	0.898747	91586	13.2283	8	18725209	204.455	0.0264194	196150	88932	38445	68773
027	A27	Sangjususugam	19005278	2869796978	1494156096	98.6512	0.796929	15145850	14305488	0.944515	149390	37.8802	12.3438	34739937	232.545	0.0490147	346379	161501	63492	121386
028	A28	Hajjiya	5120548	773202748	392912599	96.7058	0.793464	4062968	3833611	0.943549	107833	14.8905	8.41212	23680767	219.606	0.0334112	237060	100391	48333	88336
029	A29	Uiseonggomgam	7079768	1069044968	556586420	98.4528	0.798519	5653330	5308784	0.939054	106911	21.3354	10.5343	23953739	224.053	0.0337964	254393	110537	49247	94609
030	A30	Kimchunbansi	2404764	363119364	181587600	94.9218	0.795514	1913024	1787151	0.934202	66756	13.3047	8.63917	12385338	185.531	0.0174745	131557	58944	26203	46410
031	A31	Seonsahwan	17030940	2571671940	1355964118	100.024	0.79599	13556450	12580903	0.928038	150496	32.4103	11.725	36390380	241.803	0.0513433	363489	149847	71517	142125
032	A32	Milyeo	1786950	269829450	137432249	96.5722	0.796387	1423104	1329595	0.934292	60308	11.0276	7.74839	10966502	181.842	0.0154727	115865	54035	23145	38685
033	A33	Cheongsongchalgam	12218296	1844962696	968526809	99.3931	0.797525	9744402	9120840	0.936008	125705	29.7565	11.7313	29065164	231.217	0.0410081	305102	128903	59565	116634
034	A34	Hwasunjangdugam	17967802	2713138102	1426545461	99.713	0.796231	14306512	13371492	0.934644	136367	39.5671	13.8439	32139471	235.684	0.0453457	311330	127493	61310	122527
035	A35	Jangseongbidansi	7639846	1153616746	606834871	99.4699	0.798535	6100688	5668955	0.929232	109669	22.6993	10.5769	23885143	217.793	0.0336996	259821	111319	50293	98209
036	A36	Noasi(Female)	26462084	3995774684	2096196030	99.4414	0.7966	21079706	17749640	0.842025	161566	59.1865	12.7074	24084812	149.071	0.0339813	220473	198696	7250	14527
037	A37	Noasi(Male)	5347080	807409080	414469137	97.5035	0.794978	4250812	3593776	0.845433	94925	21.5213	9.32222	15262645	160.786	0.0215341	193596	175352	6289	11955
038	A38	Sancheongdanseongchalgam	3213444	485230044	252483425	98.517	0.797537	2562842	2397811	0.935606	81349	13.3311	8	16830370	206.891	0.023746	177939	78376	35409	64154
039	A39	Kimhaedanseongsi	10180468	1537250668	801974794	98.8772	0.796704	8110820	7587142	0.935435	124001	24.881	10.5977	28752697	231.875	0.0405672	303233	129213	58906	115114
040	A40	Jejudolgam(Jeju4)	6975534	1053305634	546949993	98.3075	0.797597	5563664	5210257	0.936479	103174	22.5093	11.0629	22520621	218.278	0.0317744	242924	105386	46742	90796
041	A41	Cheongdosi	8122918	1226560618	644035924	99.483	0.796983	6473830	6018691	0.929696	114557	22.6482	10.5135	25827067	225.452	0.0364395	278446	123044	52967	102435
042	A42	Andongsusigam	6452960	974396960	494821361	96.3207	0.796104	5137226	4776775	0.929835	107134	18.9026	9.83774	23300967	217.494	0.0328754	242313	105905	46865	89543
043	A43	Bonghwagolgam	12392336	1871242736	990271244	100.059	0.798628	9896868	9278883	0.937558	128009	29.3175	11.9508	30504095	238.296	0.0430383	320266	139905	60848	119513
044	A44	Bonghwabansi	11175408	1687486608	883048302	98.9919	0.798217	8920406	8371480	0.938464	124763	28.1831	11.5994	28413914	227.743	0.0400893	305097	132216	58425	114456
045	A45	Uljinjujigam	23364954	3528108054	1837350069	98.9065	0.795064	18576642	17488490	0.941424	162861	41.4841	12.5577	38257176	234.907	0.0539771	377397	168352	70929	138116
046	A46	Hoejinsinbuji	9995762	1509360062	789827802	99.2359	0.796246	7959090	7442476	0.935091	121115	26.3567	11.3844	27175431	224.377	0.0383419	284777	115026	57033	112718
047	A47	Hamyangdanseongsi	8481858	1280760558	662273900	98.0484	0.796354	6754564	6366219	0.942506	111602	24.4414	10.999	24820400	222.401	0.0350192	266008	112684	51919	101405
048	A48	Uiryeongkkuligam	4740930	715880430	369772252	97.929	0.796452	3775922	3565462	0.944263	87593	18.1907	10.6624	19054142	217.53	0.0268835	199978	85204	38590	76184
049	A49	Gosungchunggam	9166234	1384101334	722670467	99.2304	0.79452	7282756	6518268	0.895028	116927	22.7997	10.1122	27961067	239.133	0.0394503	286864	119975	56134	110755
050	A50	Gyeongsanbansi	2766078	417677778	216451535	98.3373	0.795753	2201114	2041583	0.927523	83491	10.852	6.97402	16876522	202.136	0.0238111	175487	81356	35722	58409
051	A51	Andongjjoggam	3952850	596880350	306797173	97.6766	0.794604	3140950	2503707	0.797118	98817	11.1634	6.61905	19212032	194.42	0.0271063	194380	87934	39702	66744
052	A52	Gobong	2128460	321397460	161602150	95.5056	0.794974	1692070	1590537	0.939995	71711	10.5017	7.07826	13283986	185.243	0.0187424	137075	65485	27579	44011
053	A53	Gangwonddabaegam	1217870	183898370	95127553	98.1627	0.795717	969080	887353	0.915665	52964	7.98027	5.83553	8981931	169.586	0.0126726	95197	48672	19677	26848
054	A54	Milyangbansi	14417110	2176983610	1340273639	101.342	0.917333	13225286	11810120	0.892995	141451	33.8436	10.5364	34642806	244.91	0.0488776	340977	144154	67080	129743
055	A55	Uiryeongmulgam	4504310	680150810	350983107	97.9109	0.795842	3584720	3335781	0.930556	89297	16.5659	9.56684	19232574	215.378	0.0271353	198490	85868	38719	73903
056	A56	Uiryeongmanhaegam	3985962	601880262	315254872	98.9811	0.799055	3185002	2978479	0.935158	93757	13.2741	8.07554	21200604	226.123	0.029912	211552	92280	42435	76837
057	A57	Sancheongkkuligam	5072148	765894348	397629214	98.3297	0.797263	4043836	3818861	0.944366	93938	17.7703	10	20798875	221.411	0.0293452	218253	94009	42688	81556
058	A58	Gosungttabeagam	13164818	1987887518	1217228530	101.025	0.91523	12048836	10942435	0.908174	130510	33.3512	12.0109	32403760	248.286	0.0457185	321425	135424	62571	123430
059	A59	Hamanmulgam	13236100	1998651100	1248495362	102.617	0.919194	12166544	10815995	0.888995	141238	30.1182	10.2625	34906131	247.144	0.0492491	354202	148881	69571	135750
060	A60	Goryeongsusi	9468108	1429684308	888485471	101.953	0.92042	8714632	7851917	0.901004	123602	25.136	10.4959	31226811	252.64	0.044058	312868	129275	62307	121286
061	A61	Seongjumeoggam	10507142	1586578442	995279280	102.724	0.922122	9688868	8628182	0.890525	137040	25.0193	9.64507	34225410	249.748	0.0482887	350379	146829	70086	133464
062	A62	Gangneunggodongsi	13147070	1985207570	1043326139	99.6568	0.796314	10469190	9561340	0.913284	129872	29.1564	11.1502	31496982	242.523	0.0444392	319286	136751	61272	121263
063	A63	Gabjubaekmok	9722326	1468071226	907938730	101.721	0.918074	8925818	8084969	0.905796	125177	25.5518	10.6093	31312213	250.144	0.0441785	307665	121013	62673	123979
064	A64	Kkochgam	9021938	1362312638	843372310	102.056	0.915972	8263844	7421040	0.898013	123949	24.2988	9.9917	30526057	246.279	0.0430693	315933	133679	62995	119259
065	A65	Gangneungnamyangsi	7082534	1069462634	663585506	102.366	0.915274	6482462	5749661	0.886956	112232	21.9487	9.37721	26449648	235.669	0.0373179	276374	119192	54096	103086
066	A66	Gosungdongchulsi	7404092	1118017892	582710966	99.2371	0.793062	5871906	5364339	0.91356	117873	18.0392	9.25828	28805089	244.374	0.0406412	297039	128804	57927	110308
067	A67	Uiryeongbansi	25172904	3801108504	2338757271	101.22	0.917875	23105588	20974207	0.907755	159036	51.2465	13.0492	38727290	243.513	0.0546404	349034	154946	65744	128344
068	A68	Yeongdongwolhasi	14638748	2210450948	1362375884	101.381	0.91799	13438218	12185543	0.906783	137327	36.6911	11.702	32689793	238.043	0.0461221	327786	139130	63333	125323
069	A69	Incheonjangjunsi	9924462	1498593762	904513390	99.1754	0.918976	9120340	8345540	0.915047	115181	30.1303	12	27317680	237.172	0.0385426	275156	117046	53482	104628
070	A70	Incheonnabjaggam	7402886	1117835786	687574887	101.049	0.919148	6804346	6174866	0.907489	109739	23.7547	10.1168	26017212	237.083	0.0367077	265698	112441	52720	100537
071	A71	Sangjuguseulgam	3499156	528372556	275680337	98.9118	0.796516	2787132	2632077	0.944368	80481	15.3656	9.29213	16601048	206.273	0.0234225	180094	78604	35728	65762
072	A72	Jeongeubmeogsi	11368264	1716607864	1052628308	100.708	0.919428	10452304	9489871	0.907921	126954	30.5548	11.2727	30533809	240.511	0.0430802	308720	130968	60736	117016
073	A73	Hamyanggodongsi	2034072	307144872	161065757	99.4166	0.796486	1620110	1468386	0.90635	67792	10.0377	6.46621	13308360	196.312	0.0187768	133376	63649	27406	42321
074	A74	Hamanbansi	1578116	238295516	123732096	98.6183	0.795034	1254656	1157208	0.922331	56303	9.96148	6.68421	10416428	185.007	0.0146966	107333	50826	22387	34120
075	A75	Sancheongduligam	2748788	415066988	214188321	97.8708	0.796162	2188480	2047867	0.935749	87692	10.3139	6.8076	17654241	201.321	0.0249084	182792	87087	36812	58893
076	A76	Sancheongchalgam	7800060	1177809060	711260880	99.2652	0.918616	7165258	6423718	0.896509	98387	28.6196	12.7595	22364576	227.312	0.0315542	224634	91955	43983	88696
077	A77	Goesangolgam	1714538	258895238	135224471	98.8152	0.79815	1368458	1255232	0.91726	62948	9.36797	6.19115	11677258	185.506	0.0164755	122852	60482	24672	37698
078	A78	Goesandurigam	974310	147120810	76642240	98.7655	0.796463	776002	722666	0.931268	49753	6.51274	5	7937213	159.532	0.0111986	83593	46926	17119	19548
079	A79	Sanggamdungsi	2057300	310652300	162138789	98.878	0.797057	1639786	1548374	0.944254	79222	8.60837	6	15485630	195.471	0.0218487	158706	78066	32252	48388
080	A80	Superhiratanenashi	5101970	770397470	398231097	97.7987	0.798112	4071946	3839154	0.94283	120076	12.755	7.55982	27316974	227.497	0.0385416	280273	116569	59138	104566
081	A81	Damyanggolgam	8248440	1245514440	768211682	101.673	0.91602	7555738	6678834	0.883942	120435	22.2896	9.52941	30124650	250.132	0.0425029	298412	132173	57848	108391
082	A82	Jangseonggojongsi	5322790	803741290	495006964	101.568	0.915617	4873636	4399040	0.90262	105312	17.1661	8.73616	25635334	243.423	0.036169	259897	111269	52344	96284
083	A83	Hamyangduligam	5016538	757497238	389053345	97.5214	0.795253	3989416	3765089	0.943769	97724	16.6331	9.24298	21466229	219.662	0.0302868	225359	97235	44553	83571
084	A84	Hamyangchambansi	3414174	515540274	264807292	97.5005	0.795495	2715958	2528140	0.930847	85125	13.0481	8	18073703	212.32	0.0255002	185372	82583	36944	65845
085	A85	Yeongdongsusi	3331880	503113880	261944866	98.4899	0.798232	2659612	2449992	0.921184	90108	11.7234	7.26704	19142951	212.445	0.0270088	195167	86681	40528	67958
086	A86	Okcheonbansi	2729082	412091382	214421315	98.7633	0.795528	2171062	1980000	0.911996	80466	11.0614	6.84558	16200646	201.335	0.0228575	167550	80911	32817	53822
087	A87	Jincheonbansi	4473804	675544404	346117696	97.4017	0.794292	3553508	2824197	0.794763	103972	11.8191	7.0195	21390329	205.732	0.0301797	213849	97282	43583	72984
088	A88	Jinanwolpogolbansi	1879610	283821110	146424968	97.9586	0.795252	1494764	1398341	0.935493	70661	9.07341	6.11719	13305005	188.293	0.0187721	137472	69231	27442	40799
089	A89	Jangseongjangdugam	5268908	795605108	415162475	98.6984	0.798339	4206376	3889819	0.924744	113582	13.8636	7.95419	26261328	231.21	0.0370522	269972	120649	53781	95542
090	A90	Damyangmeogsi	7097536	1071727936	555217158	98.5659	0.79365	5632956	4641872	0.824056	117953	16.1021	8.2037	26818660	227.367	0.0378385	270793	116725	54455	99613
091	A91	Jangsi	5771082	871433382	450377519	98.4608	0.792604	4574180	4222827	0.923188	124163	13.6594	7.65432	28571239	230.111	0.0403112	294827	132480	59152	103195
092	A92	Imsilbansi	4060754	613173854	320386637	99.053	0.796526	3234498	2998144	0.926927	99383	12.7561	7.60643	21796984	219.323	0.0307534	226608	101484	45912	79212
093	A93	Mujuwolhasi	5572830	841497330	437361460	98.4265	0.797356	4443532	4129173	0.929255	107926	16.0577	8.62329	24384397	225.936	0.034404	258221	112897	51159	94165
094	A94	Okcheonwolhasi	5605072	846365872	438801930	97.9582	0.799184	4479482	4186378	0.934567	102189	17.7954	9.42336	22389207	219.096	0.031589	238536	102481	47004	89051
095	A95	Chilseongdangam	4799856	724778256	448029064	101.537	0.919291	4412466	3942995	0.893603	101598	15.8718	8.31855	24890402	244.989	0.0351179	237669	98407	49222	90040
096	A96	Kiwonbang	3274596	494463996	253927433	97.541	0.794995	2603288	2448591	0.940576	82489	13.4391	8.27532	17026004	206.403	0.024022	178613	78742	36036	63835
097	A97	Ilmoggyechalang	12763990	1927362490	990442077	97.8061	0.793372	10126588	9526426	0.940734	123702	31.0199	11.8234	28752563	232.434	0.0405671	275271	102459	57462	115350
098	A98	Jeonnam15	2914472	440085272	270499262	101.219	0.91695	2672424	2416376	0.904189	80078	13.4743	7.60629	17327605	216.384	0.0244476	170721	79766	34118	56837
099	A99	Dotoligam	3545316	535342716	279219991	99.5201	0.791372	2805664	2624422	0.935401	80994	14.8486	8.89326	17029105	210.251	0.0240264	186359	78214	37633	70512
100	A100	Kkulijangdungi	4768068	719978268	447192809	102.037	0.919166	4382644	3912624	0.892754	105737	15.1748	7.96117	25440376	240.601	0.0358939	255604	110184	52613	92807
101	A101	Gyryejangdongi	7283076	1099744476	567654186	97.9848	0.795445	5793288	5368060	0.9266	118225	18.6899	9.07895	27004410	228.415	0.0381006	287165	125527	56630	105008
102	A102	Mujudaesi	15412238	2327247938	1226600398	100.037	0.795567	12261462	11516380	0.939234	148871	30.1495	10.8007	35745479	240.11	0.0504334	374165	162740	71992	139433
103	A103	Yonginjangjunsi	14965650	2259813150	1161791885	97.7825	0.793911	11881392	11142668	0.937825	143731	30.1587	10.9574	33744327	234.774	0.0476099	347572	150965	67053	129554
104	A104	Yonginbansi	8845080	1335607080	691905753	98.3533	0.795347	7034904	6588782	0.936584	117667	23.2769	10.2991	26872433	228.377	0.0379144	284238	121979	55113	107146
105	A105	Hwasunttuligam	4482798	676902498	344809379	96.6843	0.795562	3566342	3332728	0.934495	83306	18.1485	10.5	17642421	211.779	0.0248917	185891	78874	35899	71118
106	A106	Gwangyangjangdongi	7949666	1200399566	615427643	97.4841	0.794135	6313108	5879656	0.931341	101231	25.935	12.3372	22049228	217.811	0.0311093	241292	101595	46685	93012
107	A107	Damyangkkuligam	10964576	1655650976	867637322	99.6242	0.794295	8709106	8129112	0.933404	130815	24.8236	9.9902	30769160	235.211	0.0434123	320576	139524	62029	119023
108	A108	Gongjususi	44776990	6761325490	3486684714	98.3693	0.791586	35444856	33106118	0.934018	189758	64.7094	14.3435	44964060	236.955	0.0634399	404454	190106	72214	142134
109	A109	Okcheonsusi	27433884	4142516484	2144112670	98.4093	0.794189	21787694	20284562	0.93101	172062	43.5015	11.9778	41397858	240.598	0.0584083	398043	178252	74314	145477
110	A110	Hongaram	5432046	820238946	422535143	97.8959	0.794575	4316166	4046654	0.937558	115195	14.2681	7.98718	26161190	227.104	0.0369109	268998	124763	52208	92027
111	A111	Milsugam	8872996	1339822396	690949569	98.0365	0.794306	7047878	6581104	0.933771	123135	21.3193	9.66737	28792561	233.829	0.0406235	298862	128726	58863	111273
112	A112	Salangsi	6009732	907469532	564518229	102.118	0.919858	5528100	4861634	0.87944	107000	18.8139	8.81098	26195470	244.817	0.0369592	262167	110717	52682	98768
113	A113	Najupasi	11841050	1787998550	936774955	99.1428	0.797965	9448740	8748664	0.925908	124580	29.2856	10.8855	28627359	229.791	0.0403904	298753	128832	58248	111673
114	A114	Imsilmeogsi	10864638	1640560338	846912093	98.1486	0.794217	8628880	8119908	0.941015	127483	25.4128	10.4521	29906982	234.596	0.0421958	313825	134753	61285	117787
115	A115	Siheungsangsi	14146456	2136114856	1087239763	97.1239	0.791319	11194364	10443623	0.932936	133121	31.5759	11.6188	30818648	231.509	0.0434821	322323	140406	62085	119832
116	A116	Tajikistan1	5706426	861670326	443130139	97.6667	0.795098	4537168	4226200	0.931462	94430	19.8887	10.1783	20499212	217.084	0.0289224	211567	88300	42253	81014
117	A117	Kimchunttabalgam	7095184	1071372784	547715155	97.0897	0.795093	5641334	5329725	0.944763	97995	24.0854	12	21386778	218.244	0.0301747	227982	96003	44476	87503
118	A118	Najujangdugam	18334746	2768546646	1420202033	97.4182	0.795125	14578412	13750588	0.943216	142508	38.3627	12.5204	33164615	232.721	0.046792	317744	134225	61809	121710
119	A119	Najukkuligam	19409236	2930794636	1512229751	97.9646	0.795317	15436496	14589974	0.945161	157694	36.0693	12.2182	37221167	236.034	0.0525154	375176	164105	71302	139769
120	A120	Jeongeubbansi	10825790	1634694290	1005083845	101.122	0.918113	9939298	8739557	0.879293	117760	30.9275	10.9665	28656295	243.345	0.0404312	281571	116041	55739	109791
121	A121	Jangseongmeogsi	5155504	778481104	385775735	94.378	0.792854	4087562	3538808	0.86575	92155	16.7805	9.14968	18943881	205.565	0.026728	196039	85976	37936	72127
122	A122	Mujudaebansi	10988576	1659274976	1015020825	100.982	0.914722	10051490	8964344	0.891842	128529	28.4845	10.1556	31146447	242.33	0.0439446	314566	132137	62133	120296
123	A123	Ganghwagobansi	10327100	1559392100	795600629	98.0798	0.785484	8111772	7526347	0.92783	128586	23.39	9.9631	29787065	231.651	0.0420266	318241	136612	62514	119115
124	A124	Johongsi	2786034	420691134	215881016	97.5316	0.79448	2213448	2077460	0.938563	86371	10.5651	6.82258	17414779	201.628	0.0245706	173906	76974	36733	60199
125	A125	Jinangolgam	11527318	1740625018	909342496	98.9286	0.797402	9191904	8521093	0.927022	126164	26.6613	10.9352	30350303	240.562	0.0428213	313064	131589	61122	120353
126	A126	Gwangjupasi	9827252	1483915052	763929963	97.4685	0.797548	7837710	7288109	0.929877	118236	25.0556	10.5213	27328125	231.132	0.0385573	281353	119716	55082	106555
127	A127	Siheunggojongsi	12721432	1920936232	993121072	97.9558	0.796959	10138464	9509232	0.937936	135623	27.6551	10.6766	31769903	234.252	0.0448242	329881	142718	63365	123798
128	A128	Seojo	8932844	1348859444	699223034	98.2566	0.796644	7116294	6529648	0.917563	130167	19.489	9.07895	30619968	235.236	0.0432018	312921	133675	61665	117581
129	A129	Daegungjosaeng	8736760	1319250760	795033084	98.6624	0.922324	8058120	7282659	0.903767	126001	24.4847	10	27599007	219.038	0.0389395	281217	117253	55590	108374
130	A130	Sanggyo01ho	6123902	924709202	569432123	100.894	0.921615	5643880	5359523	0.949617	120365	17.9413	9.05952	28763185	238.966	0.040582	295859	128547	58637	108675
131	A131	Eunpungjunsi	2552540	385433540	238515863	101.45	0.921072	2351074	2201984	0.936586	82972	11.8636	7.38683	17533964	211.324	0.0247387	180835	82029	36991	61815
132	A132	Sangjusukkochgam	1972932	297912732	186143643	102.373	0.921614	1818282	1683895	0.926091	79465	9.18091	6	16519986	207.89	0.0233081	166795	80917	34555	51323
133	A133	Bonghwagoyom	7279684	1099232284	671647954	100.479	0.918237	6684478	5674632	0.848927	96796	29.7228	11	19637869	202.879	0.0277071	211137	193900	6986	10251
134	A134	Mihyang	5868344	886119944	538723219	99.4822	0.922794	5415270	5086203	0.939234	119310	17.8069	9.24615	27274592	228.603	0.0384818	286771	122205	57387	107179
135	A135	Uiseongsagoksi	3453138	521423838	315225154	98.8449	0.923533	3189088	2958658	0.927744	96564	13.1988	7.89648	20774876	215.141	0.0293113	212133	93537	43713	74883
136	A136	Tonewase 1	8124304	1226769904	757065448	101.223	0.920593	7479176	6994672	0.93522	139303	19.2962	9	34208026	245.566	0.0482642	349667	138731	72729	138207
137	A137	Mungyeongbidansi	3066266	463006166	276901439	97.7533	0.923813	2832656	2667117	0.941561	85819	14.4144	8.37681	17452499	203.364	0.0246238	181305	81608	36148	63549
138	A138	Virginiagam	8609976	1300106376	807969434	102.028	0.919759	7919106	7327087	0.925242	124654	23.2575	10.0682	30852801	247.508	0.0435303	313379	132849	62307	118223
139	A139	Sangjudungsi	5277940	796968940	485789054	99.6335	0.9238	4875760	4588966	0.94118	112189	17.0642	8.79245	25630133	228.455	0.0361616	265638	116842	52906	95890
140	A140	Hiratanenashi 1	7696154	1162119254	724489709	102.195	0.92115	7089312	6651471	0.938239	136095	18.5046	8.84409	34609013	254.3	0.0488299	348737	137512	72985	138240
141	A141	Ojogam	5861510	885088010	542958379	100.659	0.92025	5394056	5099857	0.945459	112772	19.473	9.49071	25437424	225.565	0.0358897	271650	116551	54079	101020
142	A142	Daegam	15682502	2368057802	1448828541	100.622	0.918139	14398722	13329097	0.925714	149679	35.6426	11.3621	34854257	232.86	0.049176	340098	153023	64436	122639
143	A143	Jungchonbansi	10545754	1592408854	963299371	99.2569	0.920286	9705112	9155286	0.943347	125210	29.1293	11.7299	30068622	240.146	0.0424239	298790	125815	58876	114099
144	A144	Seochonjosaeng(Donam)	3366392	508325192	300335214	97.0015	0.919735	3096190	2751505	0.888674	73555	17.7435	10.4557	15488209	210.566	0.0218524	154500	64086	30888	59526
145	A145	Sancheongdanseongsi	6027234	910112334	561168226	101.375	0.918422	5535544	5172752	0.934461	116834	17.253	8.894	29029066	248.464	0.0409572	292904	122571	59667	110666
146	A146	Wolhasi	7126514	1076103614	672609482	102.735	0.918688	6547042	6019442	0.919414	126880	18.8152	8.73116	31429275	247.709	0.0443436	321186	137021	64964	119201
147	A147	Gambaekmok	8844554	1335527654	823408251	101.134	0.920538	8141750	7589047	0.932115	131191	22.9618	9.76159	31859187	242.846	0.0449502	315414	130271	64189	120954
148	A148	Gyeongjudegodongsi	5508980	831855980	510857468	101.108	0.917153	5052580	4694635	0.929156	109632	17.2811	8.72145	26409277	240.89	0.0372609	265079	113606	53512	97961
149	A149	Gyeongjudolgam	12428090	1876641590	1160045617	101.209	0.922252	11461836	10762041	0.938946	152815	27.461	10.8514	37277417	243.938	0.0525948	387268	166357	74653	146258
150	A150	Gyryekurigam	3869462	584288762	360660917	101.319	0.919938	3559664	3260615	0.91599	98033	14.1786	8	21986841	224.28	0.0310213	226093	98496	45628	81969
151	A151	Gyryemulgam	11026460	1664995460	1034926913	102.045	0.919778	10141896	9301706	0.917157	139422	26.2037	10	34332676	246.25	0.0484401	351643	151812	68732	131099
152	A152	Daemaban	2344986	354092886	217953339	100.934	0.920843	2159364	2021962	0.936369	85209	10.291	6.76	18025005	211.539	0.0254315	182119	85322	37002	59795
153	A153	Modongbulwanjeondangam	9963866	1504543766	933618545	101.497	0.923187	9198514	8617203	0.936804	137624	24.8616	10	33500134	243.418	0.0472654	331704	134017	67999	129688
154	A154	Yaokki	8860230	1337894730	824761194	101.044	0.921241	8162408	7593325	0.93028	127529	23.6632	10	30702024	240.745	0.0433176	300181	118984	61748	119449
155	A155	Boeunmeoggam	2953482	445975782	276906717	101.685	0.922027	2723190	2564073	0.94157	84807	13.5258	8	18412570	217.111	0.0259783	192574	85643	38816	68115
156	A156	Sancheonggodongsi	5146908	777183108	471495311	99.3803	0.921787	4744354	4462482	0.940588	106104	17.8143	9.18079	24138014	227.494	0.0340564	250197	108271	50570	91356
157	A157	Sangseojosaeng	8819810	1331791310	815690070	100.729	0.918146	8097876	7609079	0.939639	134423	22.0242	9.66027	33119583	246.383	0.0467285	305359	111734	66636	126989
158	A158	Sangjuhagdongsi	3812946	575754846	354869164	100.915	0.922253	3516500	3314597	0.942584	95744	14.6675	8.56463	21985220	229.625	0.031019	226449	98636	45319	82494
159	A159	Geumdongi	8817878	1331499578	823526460	101.531	0.919848	8111108	7487499	0.923117	130448	22.6821	9.91308	31779576	243.619	0.0448379	325498	137922	64643	122933
160	A160	Sinchu	1503354	227006454	131202417	94.5088	0.923439	1388256	1316501	0.948313	58167	11.8877	8.06905	10171243	174.863	0.0143506	107605	50544	21438	35623
161	A161	Mabansi	4302066	649611966	397290112	100.285	0.920865	3961620	3734432	0.942653	100540	15.9412	8.74027	22647479	225.258	0.0319534	236142	102753	47059	86330
162	A162	Andongsukkochgam	3745794	565614894	349837505	101.694	0.918393	3440110	3025456	0.879465	83188	16.5305	8.30079	18401812	221.208	0.0259632	187489	82266	38087	67136
163	A163	Yecheonbuchaegam	5616654	848114754	507646569	98.0412	0.921882	5177890	4904711	0.947241	111613	18.5044	9.34524	24962122	223.649	0.0352191	260664	112899	51833	95932
164	A164	Uljinwolhasi	3371028	509025228	300896292	96.6748	0.923296	3112458	2878779	0.924921	92038	14.0209	8	18772692	203.967	0.0264864	191741	86548	38755	66438
165	A165	Idu	3193260	482182260	290490032	98.493	0.923617	2949348	2678012	0.908001	91011	12.9984	7.86385	19251576	211.53	0.0271621	177644	69792	39365	68487
166	A166	Jangoghyeonhasuhyeong	10787912	1628974712	995064010	100.366	0.919024	9914346	8843817	0.892022	135768	26.7716	10.1346	30508627	224.711	0.0430447	305955	127907	60851	117197
167	A167	Jeongeubchambansi	2396312	361843112	213723325	96.8256	0.921125	2207302	1975255	0.894873	74554	12.4944	7.88296	14439357	193.676	0.0203725	149926	66962	30675	52289
168	A168	JosaengSP1	7117528	1074746728	654994260	99.9392	0.920815	6553928	6145810	0.937729	117463	22.3776	10.2051	26867084	228.728	0.0379068	280542	115995	56286	108261
169	A169	Josaengseojo	6894448	1041061648	635008397	100.17	0.919484	6339332	5971350	0.941953	118080	21.3232	10	27471759	232.654	0.03876	268870	104617	56792	107461
170	A170	Myeongjugojongsi	6207252	937295052	568619346	99.8492	0.91744	5694784	5354929	0.940322	113759	19.3843	9.39785	26510038	233.037	0.0374031	271944	116735	54185	101024
171	A171	Changnyeongmulgam	6735130	1017004630	623394996	100.786	0.918368	6185328	5692492	0.920322	120780	19.7149	9.26227	27606706	228.57	0.0389504	293064	125804	58781	108479
172	A172	Cheongsongmeogsi	6192848	935120048	575784357	100.833	0.922073	5710256	5354376	0.937677	116581	19.284	9.14784	26933793	231.031	0.038001	282116	122276	55765	104075
173	A173	Aetang	10594992	1599843792	988303212	101.45	0.919471	9741784	8861148	0.909602	133725	25.2112	10.1701	34457229	257.672	0.0486158	331579	134292	67032	130255
174	A174	Hadongwolyegam	2281096	344445496	206749633	98.507	0.920098	2098832	1995220	0.950633	77554	11.8619	7.79794	15684639	202.242	0.0221295	158052	67973	33515	56564
175	A175	Heugsi	3224798	486944498	290350456	97.9518	0.919195	2964218	2754273	0.929174	73455	17.8402	10.8971	15246967	207.569	0.021512	157856	65909	31032	60915
176	A176	Gyeongjusogodongsispur	8236286	1243679186	767192871	100.935	0.922846	7600826	7001917	0.921205	129518	21.7759	9.73684	30810511	237.886	0.0434706	317556	134463	63158	119935
177	A177	Namyangsusi	9655596	1457994996	887373414	99.9449	0.919532	8878630	7362964	0.829291	153586	18.8009	8.18911	34054303	221.728	0.0480473	341252	141234	69602	130416
178	A178	Tonewase mutant	11661648	1760908848	1080533759	100.688	0.920242	10731540	10216572	0.952014	146764	26.3398	10.3458	36224036	246.818	0.0511086	363857	142877	74056	146924
179	A179	Meongchungi	14742530	2226122030	1334297917	98.5613	0.918279	13537750	12904784	0.953244	143072	35.7328	11.8477	33637047	235.106	0.0474586	319102	134381	63727	120994
180	A180	Jaelaebongok	4658782	703476082	431482963	100.577	0.920857	4290072	4067741	0.948175	100061	17.8023	9.68421	22440764	224.271	0.0316617	229956	93068	47320	89568
181	A181	Rosobrillant	12354252	1865492052	1150772659	101.277	0.91973	11362578	10519870	0.925835	139021	30.3175	10.7016	33660859	242.128	0.0474922	332766	140230	66291	126245
182	A182	Chalang	9205876	1390087276	852143826	100.599	0.920139	8470688	7949024	0.938415	123356	25.9947	10.8441	29704952	240.807	0.0419108	274870	103827	58979	112064
183	A183	Cheongdobansi	2705496	408529896	251038339	100.722	0.921227	2492376	2319137	0.930492	84320	12.2192	7.46942	17915317	212.468	0.0252768	184277	82359	37967	63951
184	A184	Uiryeonggun1	4180458	631249158	386915344	101.069	0.915743	3828224	3495647	0.913125	96907	15.5546	8	21914952	226.144	0.0309199	228771	99361	46151	83259
185	A185	Uiryeonggun2	6779022	1023632322	620881697	100.487	0.911444	6178698	5720094	0.925777	116320	20.1648	9.56556	27552986	236.872	0.0388746	290866	122969	57834	110063
186	A186	Uiryeonggun3	6000142	906021442	558974132	101.481	0.918005	5508162	5060525	0.918732	116344	17.984	8.6777	27479173	236.189	0.0387704	288287	122902	57973	107412
187	A187	Hiratanenashi 2	5221032	788375832	491891274	102.205	0.921812	4812810	4394179	0.913017	109485	16.3644	8.23699	26437378	241.47	0.0373006	268761	106846	56596	105319
188	A188	Hiratanenashi 3	8838690	1334642190	832709317	102.016	0.923503	8162556	7470463	0.915211	129332	22.7594	9.51674	32042521	247.754	0.0452089	325965	126681	67565	131719
189	A189	Ohtanenashi 2	15879914	2397867014	1478306985	101.232	0.919596	14603098	13594926	0.930962	149576	33.9148	11.8342	37903324	253.405	0.0534779	359201	142370	71492	145339
190	A190	Ohtanenashi 3	7843646	1184390546	729057614	100.878	0.921399	7227128	6744590	0.933232	116543	23.3821	10.7619	28275346	242.617	0.0398938	285368	111881	57412	116075
191	A191	Tonewase 2	14881508	2247107708	1388887540	101.392	0.920487	13698234	12560234	0.916924	144930	34.2455	11.1504	35376190	244.092	0.0499123	347295	137045	70284	139966
192	A192	Tonewase 3	2977114	449544214	279118370	101.904	0.920029	2739032	2515802	0.9185	97809	10.6701	6.4467	21771866	222.596	0.030718	217558	93064	48120	76374
			1575744844					1350376592	1240608081	0.918713
